# Supplementary material for: High proton conductivity in a charge carrier-induced Ni(ii) metal–organic framework
Source: Royal Society of Chemistry journal article supplement (doi:10.1039/d1nj04685c), 2021-12-15
Supplement: d1nj04685c1.pdf [file d1nj04685c1.pdf]

# High proton conductivity in a charge carrier induced Ni(II)-metal-organic framework

Debabrata Chakraborty,<sup>a</sup> Arijit Ghorai,<sup>b</sup> Piyali Bhanja,<sup>c</sup> Susanta Banerjee,<sup>b</sup> Asim Bhaumik\*<sup>a</sup>

<sup>a</sup>*School of Materials Sciences, Indian Association for the Cultivation of Science, 2A & 2B, Raja S.C. Mullick Road, Jadavpur, Kolkata-700032, India*

<sup>b</sup>*Materials Science Centre, Indian Institute of Technology Kharagpur, Kharagpur 721302, India*

<sup>c</sup>*Materials Chemistry Division, CSIR - Institute of Minerals & Materials Technology, Bhubaneswar, Odisha 751013, India*

Corresponding author: msab@iacs.res.in

## Supporting Information

| Entry               | Table of contents                                                                                                                                        | Page No      |
|---------------------|----------------------------------------------------------------------------------------------------------------------------------------------------------|--------------|
| <b>Experimental</b> | <sup>1</sup> H-NMR, <sup>13</sup> C-NMR and <sup>31</sup> P NMR spectra (Figure S1-S7) of TPE, TPE-Br, TPE-Ester and TPE-Acid (H <sub>8</sub> L ligand). | <b>S2-S5</b> |
| <b>Figure S8</b>    | Solid state UV-Visible spectra of as-synthesized H <sub>8</sub> L-Ni-MOF and H <sub>8</sub> L-ligand.                                                    | <b>S6</b>    |
| <b>Figure S9</b>    | Direct optical band gap measurement of H <sub>8</sub> L-Ni-MOF material using Tauc equation                                                              | <b>S7</b>    |
| <b>Figure S10</b>   | UHR-TEM images of H <sub>8</sub> L-Ni-MOF material at different magnifications.                                                                          | <b>S8</b>    |
| <b>Figure S11</b>   | HADDF images and elemental mapping of H <sub>8</sub> L-Ni-MOF material containing elements C, P, O, and Ni atom.                                         | <b>S9</b>    |
| <b>Figure S12</b>   | Full scale XPS survey spectrum of H <sub>8</sub> L-Ni-MOF.                                                                                               | <b>S10</b>   |
| <b>Figure S13</b>   | Thermogravimetric plot of H <sub>8</sub> L-Ni-MOF.                                                                                                       | <b>S11</b>   |
| <b>Figure S14</b>   | Water uptake (weight %) of H <sub>8</sub> L-Ni-MOF with time at 30 °C under 98% RH and PXRD pattern of the H <sub>8</sub> L-Ni-MOF.                      | <b>S12</b>   |
| <b>Table S1.</b>    | Proton conductivity of H <sup>+</sup> @H <sub>8</sub> L-Ni-MOF at 98% RH in different temperatures.                                                      | <b>S13</b>   |
| <b>Figure S15</b>   | PXRD data of as-synthesized, H <sup>+</sup> @H <sub>8</sub> L-Ni-MOF and washed MOF                                                                      | <b>S14</b>   |

## Experimental Section

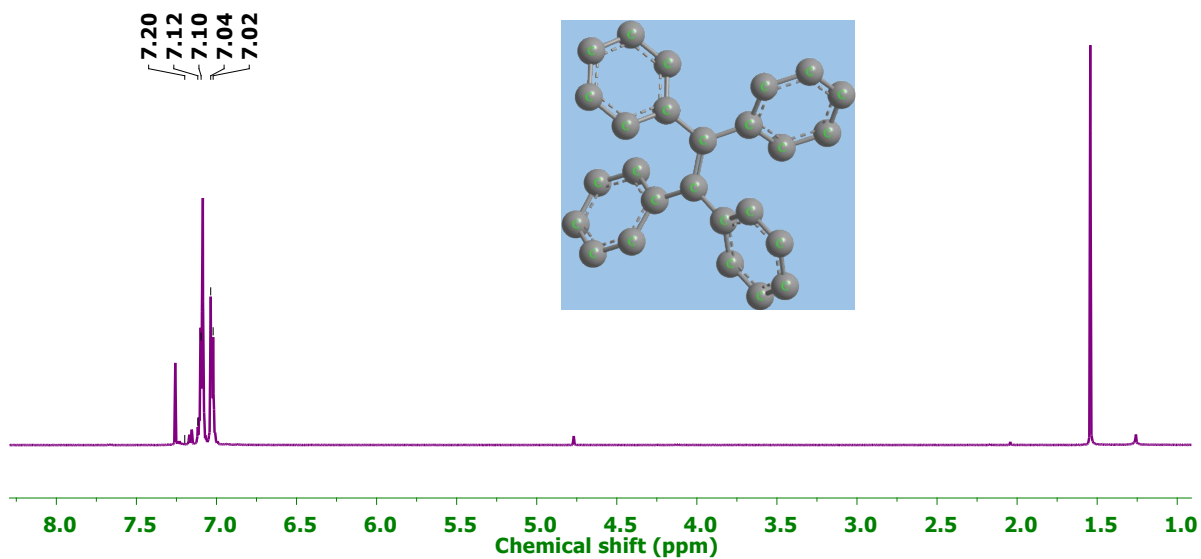

Fig.S1.  $^1\text{H}$  NMR spectra of TPE.

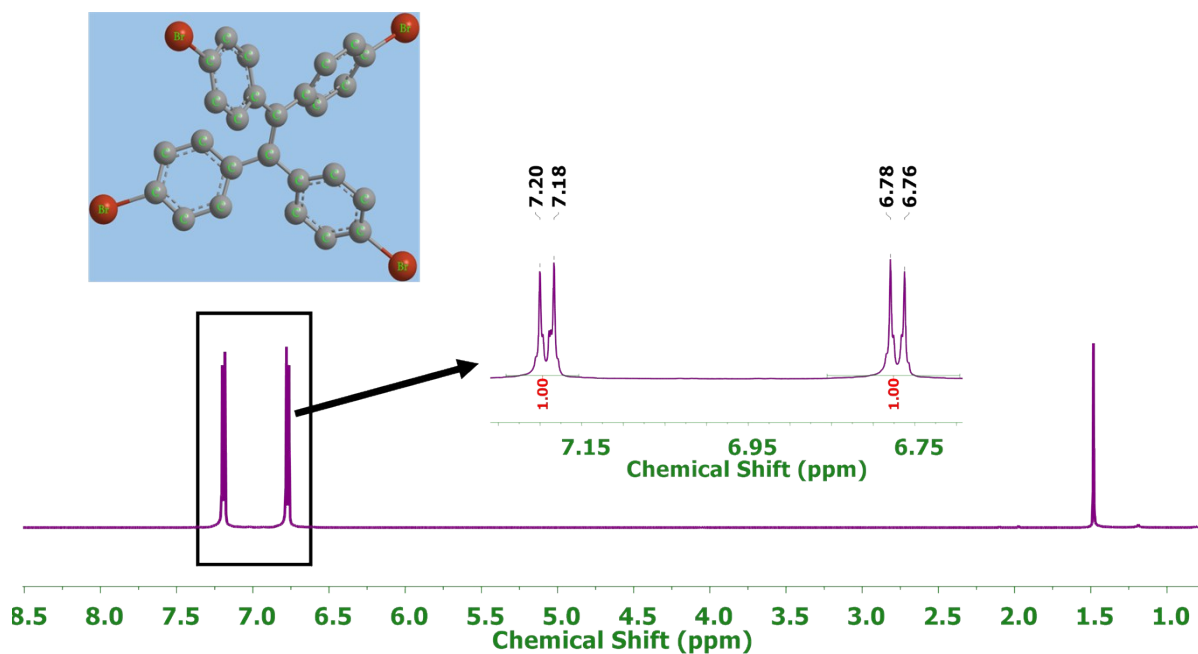

Fig. S2.  $^1\text{H}$  NMR spectra of TPE-Br.

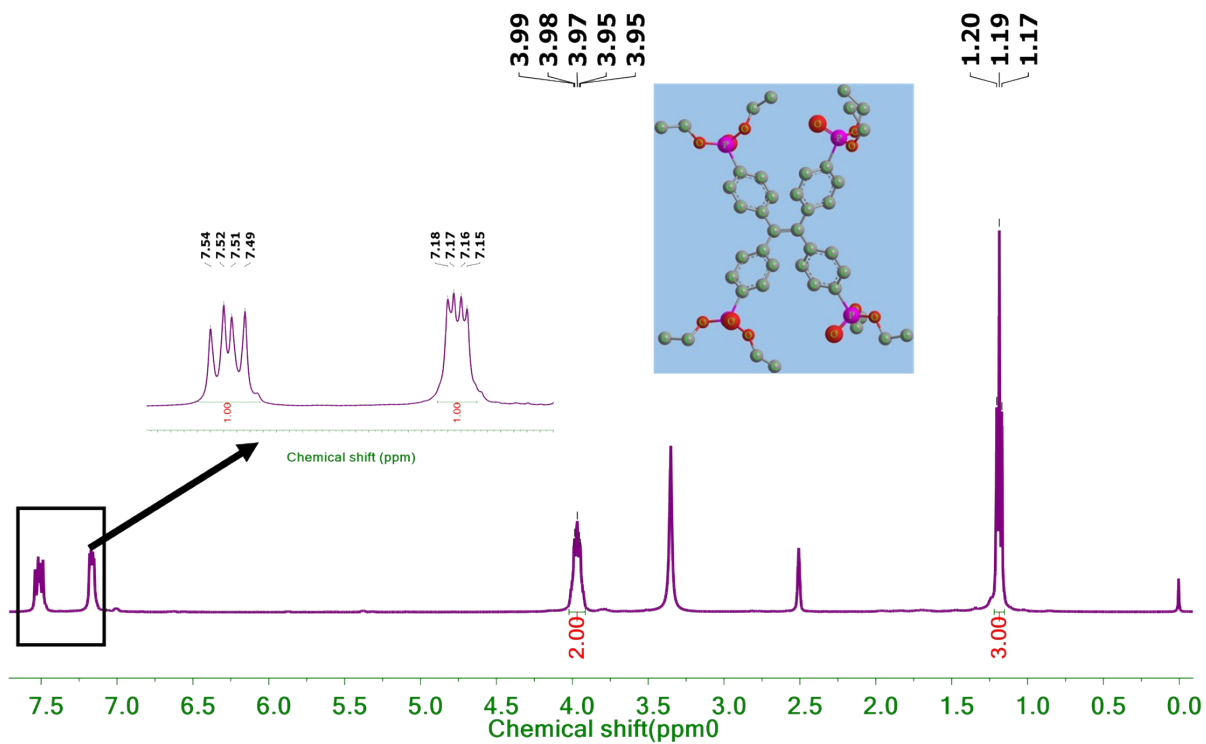

Fig. S3.  $^1\text{H}$  NMR spectra of TPE-PE.

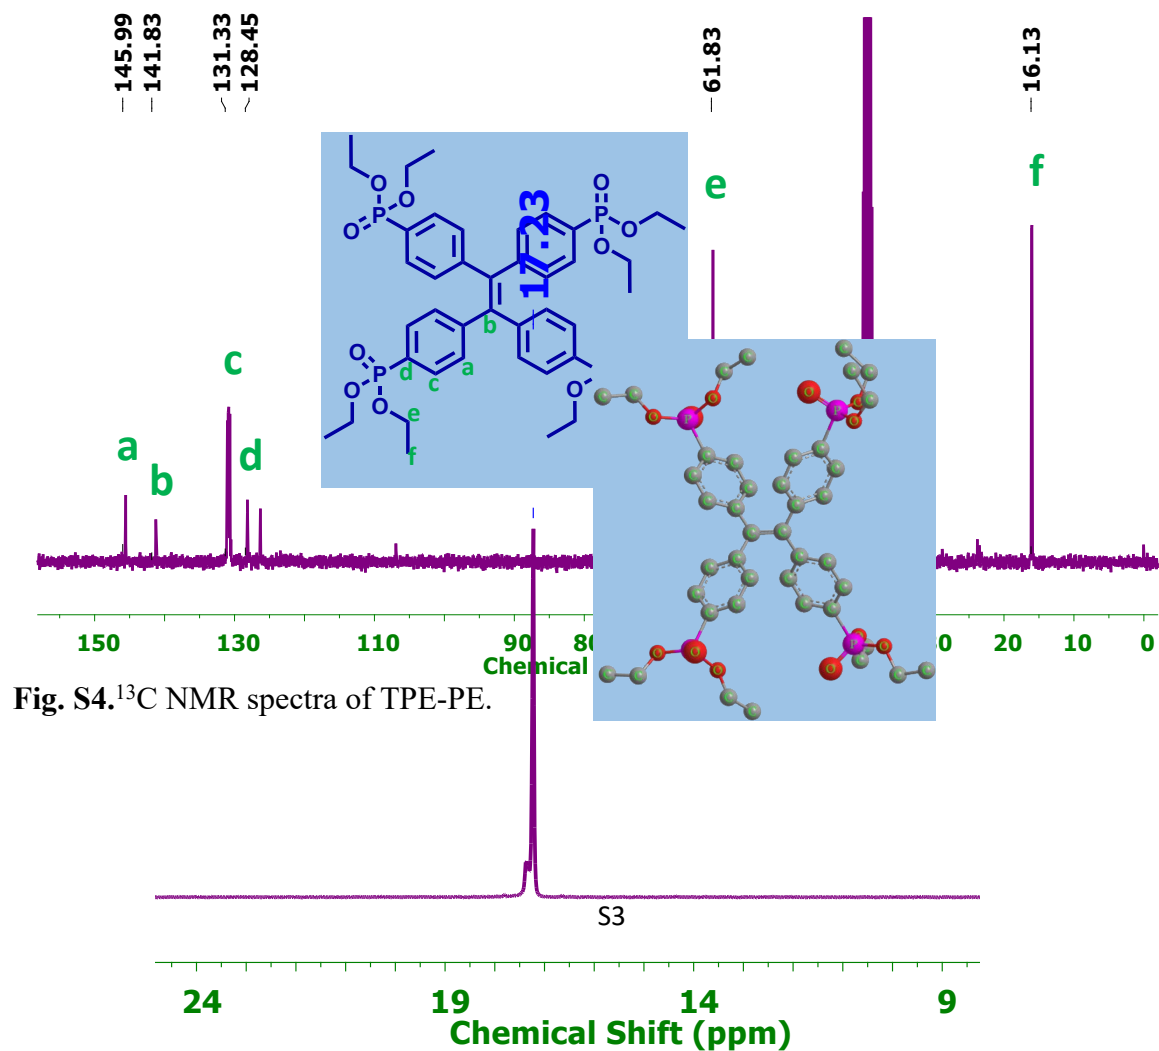

Fig. S4.  $^{13}\text{C}$  NMR spectra of TPE-PE.

**Fig. S5.**  $^{31}\text{P}$  NMR spectra of TPE-PE.

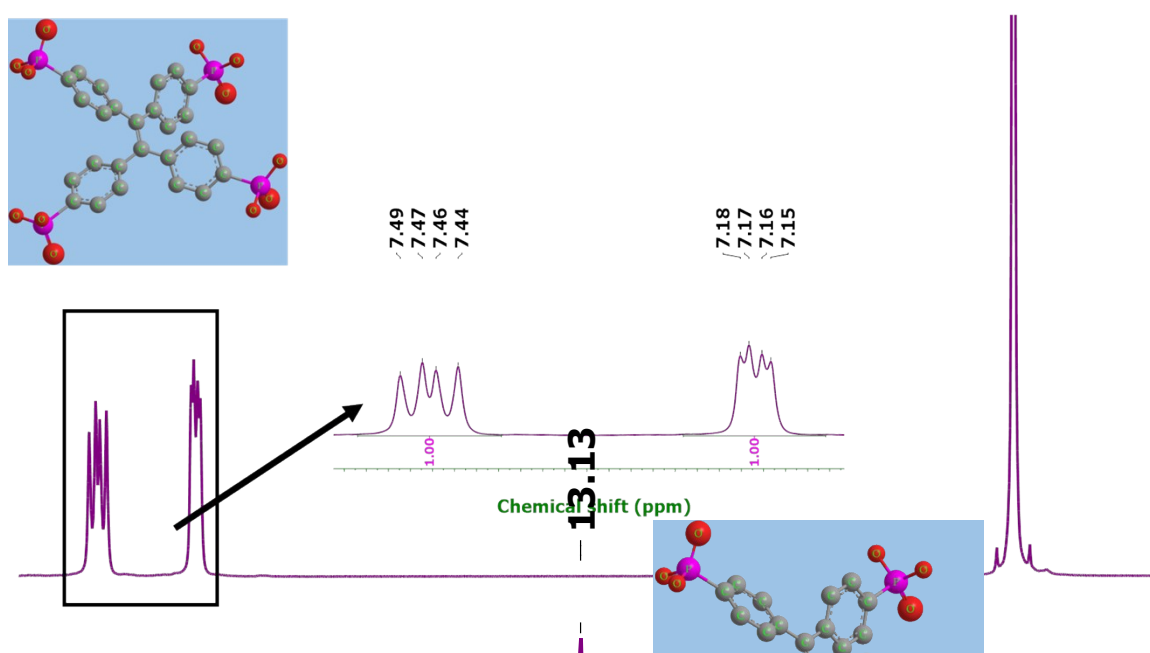

**Fig. S6.**  $^1\text{H}$  NMR Spectra of TPE-PA.

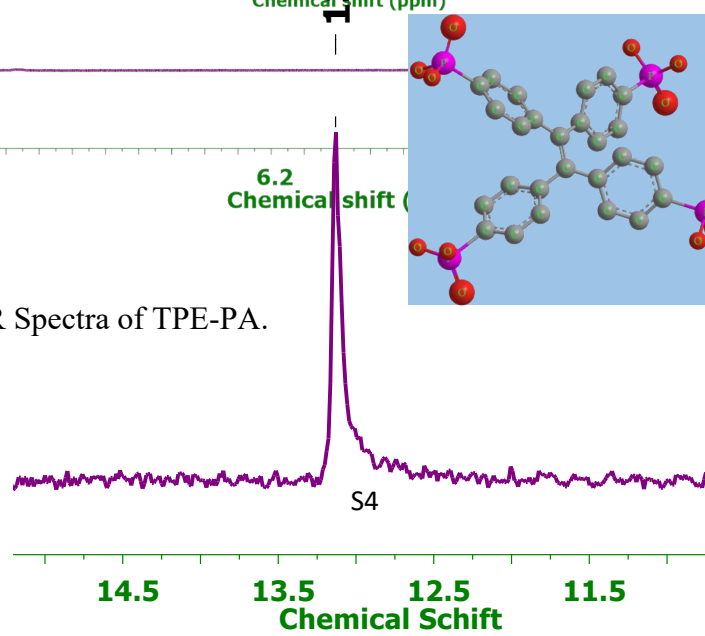

**Fig. S7.**  $^{31}\text{P}$  NMR spectra of TPE-PA.

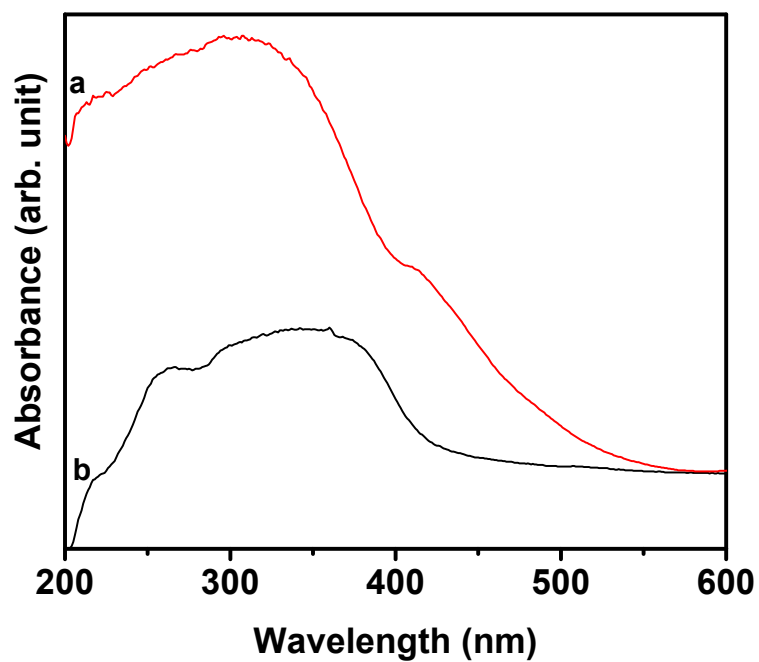

**Fig. S8.** Solid state UV-Visible spectra of as-synthesized H<sub>8</sub>L-Ni-MOF (a) and H<sub>8</sub>L-ligand (b).

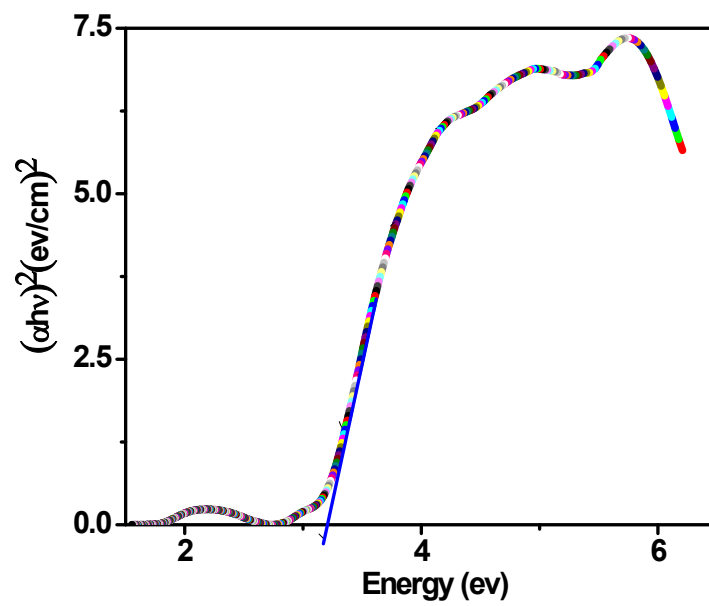

**Fig. S9.** Direct optical band gap of H<sub>8</sub>L-Ni-MOF material using Tauc equation.

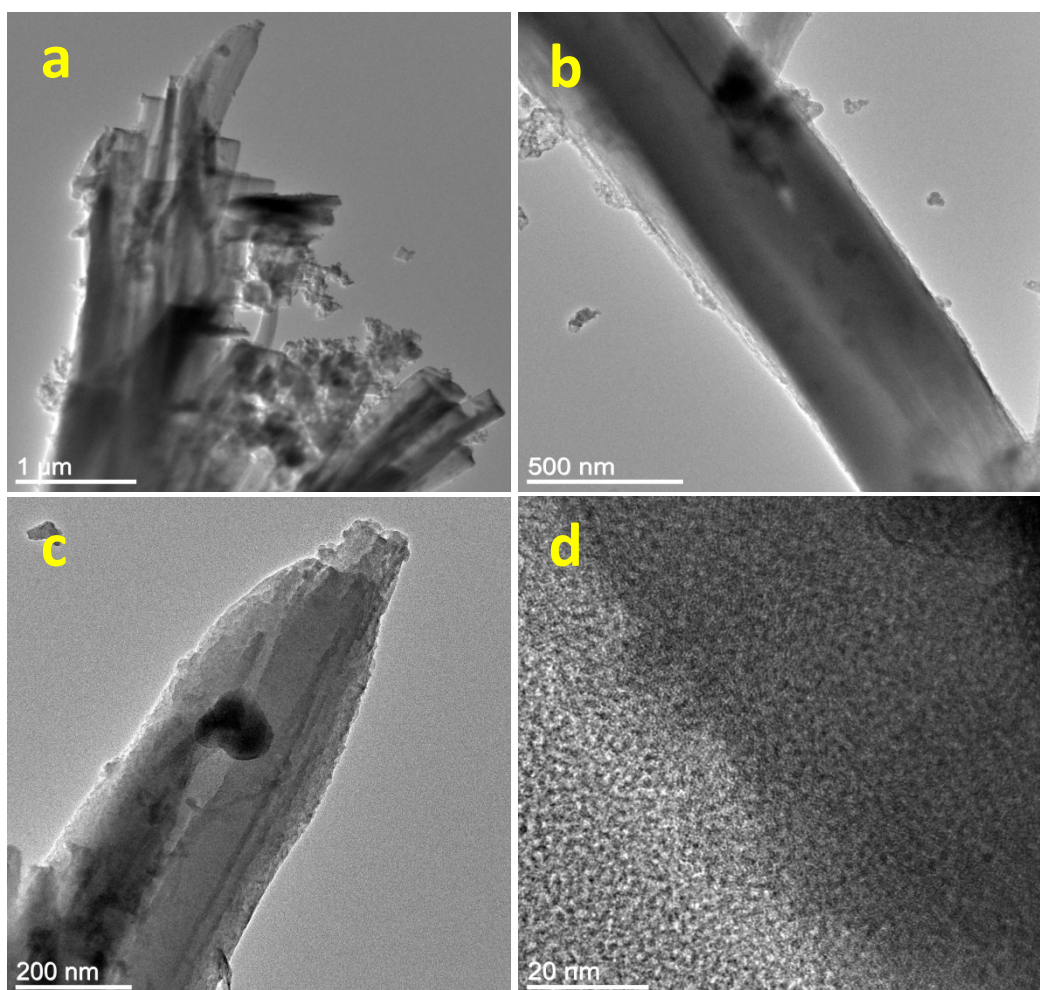

**Fig. S10.**UHR-TEM images with different magnification of H<sub>8</sub>L-Ni-MOF.



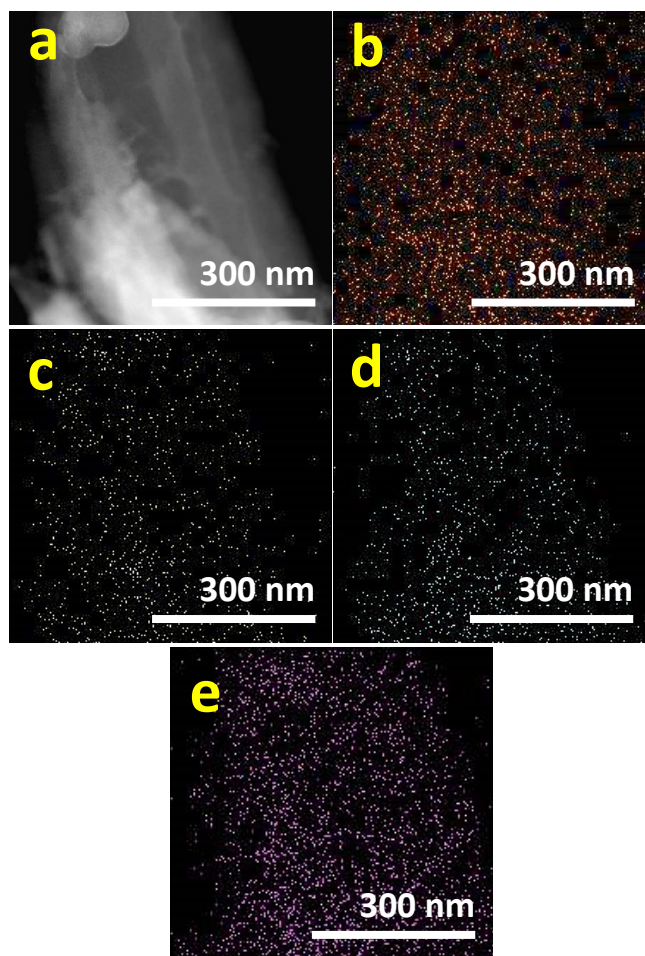

**Fig. S11.** HADF image and elemental mapping of H<sub>8</sub>L-Ni-MOF material containing elements (b) C, (c) P, (d) O, and (e) Ni.

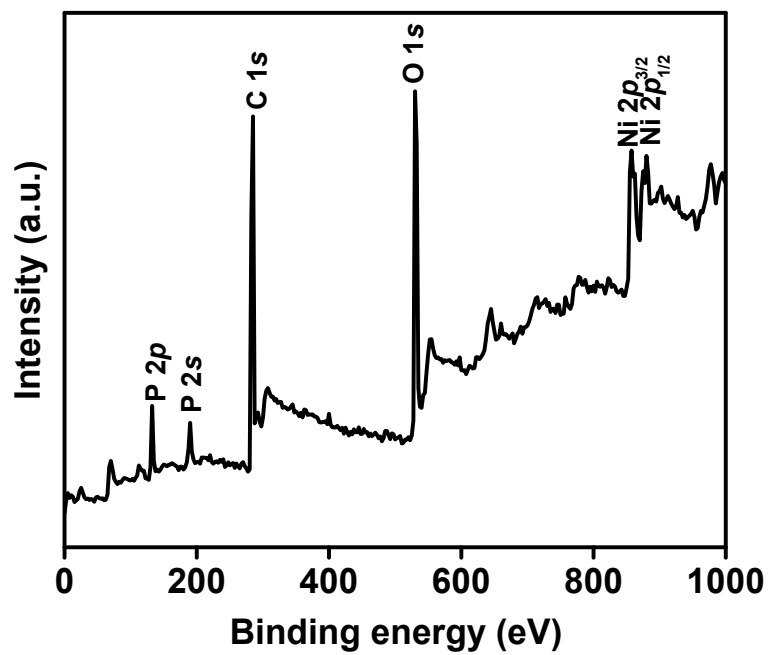

**Fig. S12.** Full scale XPS survey spectrum of H<sub>8</sub>L-Ni-MOF.

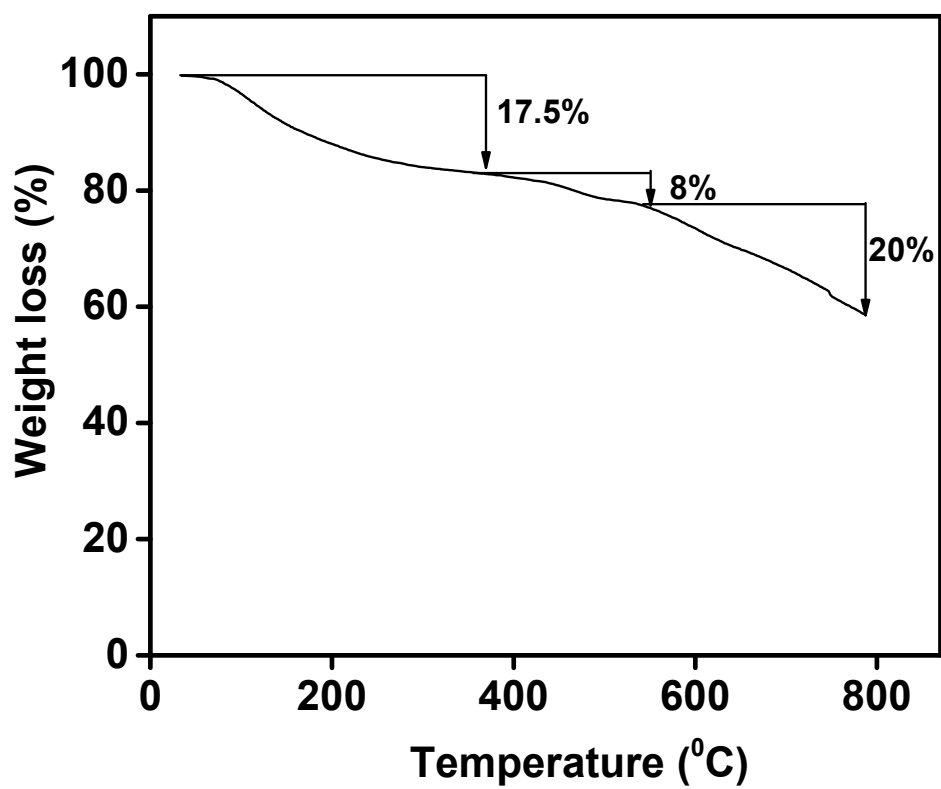

Fig. S13. TGA plot of H<sub>8</sub>L-Ni-MOF material in N<sub>2</sub> atmosphere.

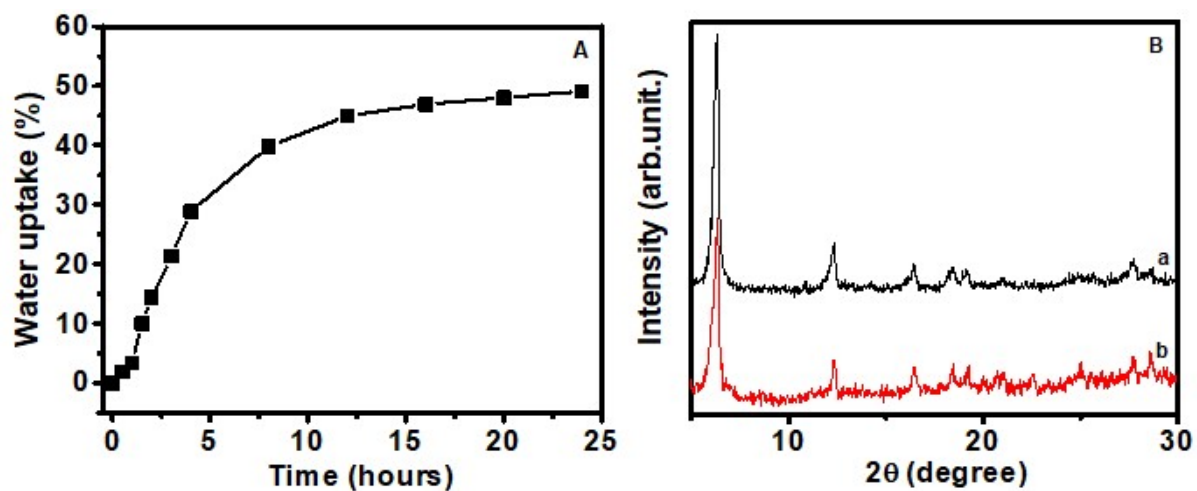

**Fig. S14.** Water uptake (weight %) of H<sub>8</sub>L-Ni-MOF with time at 30 °C under 98% RH (A) and PXRD pattern of the H<sub>8</sub>L-Ni-MOF (B) as-synthesized (a), after water uptake (b).

**Table S1.** Proton conductivity of H<sup>+</sup>@H<sub>8</sub>L-Ni-MOF at 98% RH in different temperatures.

| Temperature (°C) | Proton Conductivity (S cm <sup>-1</sup> ) |                       |
|------------------|-------------------------------------------|-----------------------|
|                  | Without doping                            | SA-doped sample       |
| 20               | $9.36 \times 10^{-6}$                     | $3.45 \times 10^{-3}$ |
| 30               | $1.25 \times 10^{-5}$                     | $4.07 \times 10^{-3}$ |
| 40               | $1.56 \times 10^{-5}$                     | $4.73 \times 10^{-3}$ |
| 50               | $1.97 \times 10^{-5}$                     | $5.20 \times 10^{-3}$ |
| 60               | $2.60 \times 10^{-5}$                     | $6.31 \times 10^{-3}$ |
| 70               | $3.11 \times 10^{-5}$                     | $7.67 \times 10^{-3}$ |
| 80               | $4.67 \times 10^{-5}$                     | $9.77 \times 10^{-3}$ |
| 90               | $5.45 \times 10^{-5}$                     | $1.17 \times 10^{-2}$ |

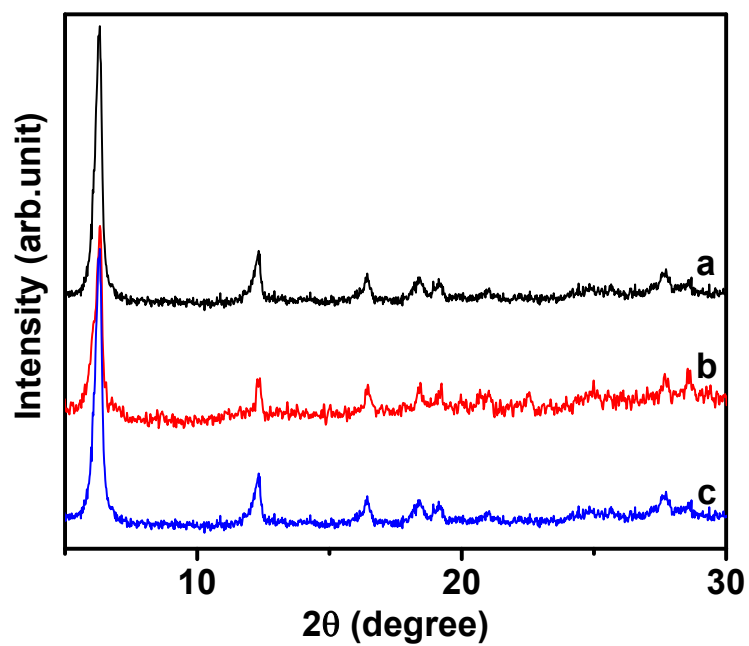

**Fig. S15.** PXRD pattern data of as-synthesized MOF (a), H<sup>+</sup>@H<sub>8</sub>L-Ni-MOF (b), and washed H<sup>+</sup>@H<sub>8</sub>L-Ni-MOF after proton conductivity measurement (c).
